# Supplementary material for: Conversion of ternary Zn2SnO4 octahedrons into binary mesoporous SnO2 and hollow SnS2 hierarchical octahedrons by template-mediated selective complex extraction
Source: Royal Society of Chemistry journal article supplement (doi:10.1039/c3ta10228a), 2013-01-01
Supplement: c3ta10228a.pdf [file c3ta10228a.pdf]

## Supplementary Information

### Conversion of Ternary $\text{Zn}_2\text{SnO}_4$ Octahedrons into Binary Mesoporous $\text{SnO}_2$ and Hollow $\text{SnS}_2$ Hierarchical Ones by Template-Engaged Selective Complex-Extracted Route

Ping Cai, De-Kun Ma,\* Quan-Cheng Liu, Shu-Mei Zhou, Wei Chen, and Shao-Ming Huang\*

Nanomaterials and Chemistry Key Laboratory, Wenzhou University, Wenzhou, Zhejiang 325027, P. R. China

#### Experimental part

**I. Synthesis of irregular  $\text{Zn}_2\text{SnO}_4$  particles:** 1 mmol of Zn  $(\text{CH}_3\text{COO})_2$  was dissolved into 40 mL of ultrapure water under stirring. Then 1 mmol of  $\text{Na}_2\text{SnO}_3$  and 15 mmol of NaOH were added into the solution. Subsequently, the solution was poured into a stainless steel autoclave with a Teflon liner of 50 mL capability and heated at 180 °C for 12 h. After the autoclave was cooled to room temperature, the resulting white precipitations were separated centrifugally and washed by diluted hydrochloric acid (pH= 2.50), deionized water, and absolute ethanol for several times. The products were dried at 60 °C for 4 h under vacuum for further characterization.

**II. Synthesis of  $\text{SnO}_2$  nanoparticles through solid-state reaction:** 5 mmol of  $\text{SnCl}_4 \cdot 5\text{H}_2\text{O}$  and 20 mmol of NaOH powders were mixed and ground together. Then they were put into a porcelain boat and reacted at 300 °C for 10 h in air. After the porcelain boat naturally cooled to room temperature, the resultant products were washed by ultrapure water and absolute ethanol for several times. After that, the products were dried at 60 °C for 4 h under vacuum for further characterization.

**III. Synthesis of  $\text{SnS}_2$  flowers through solid-state reaction:** 5 mmol of  $\text{SnCl}_2$  and 20 mmol of thiourea powders were mixed and ground together. Then they were put into a porcelain boat and reacted at 400 °C for 5 h under an Ar atmosphere. After the porcelain boat naturally cooled to room temperature, the resultant products were washed by ultrapure water and absolute ethanol for several times. Then, the products were dried at 60 °C for 4 h under vacuum for further characterization.

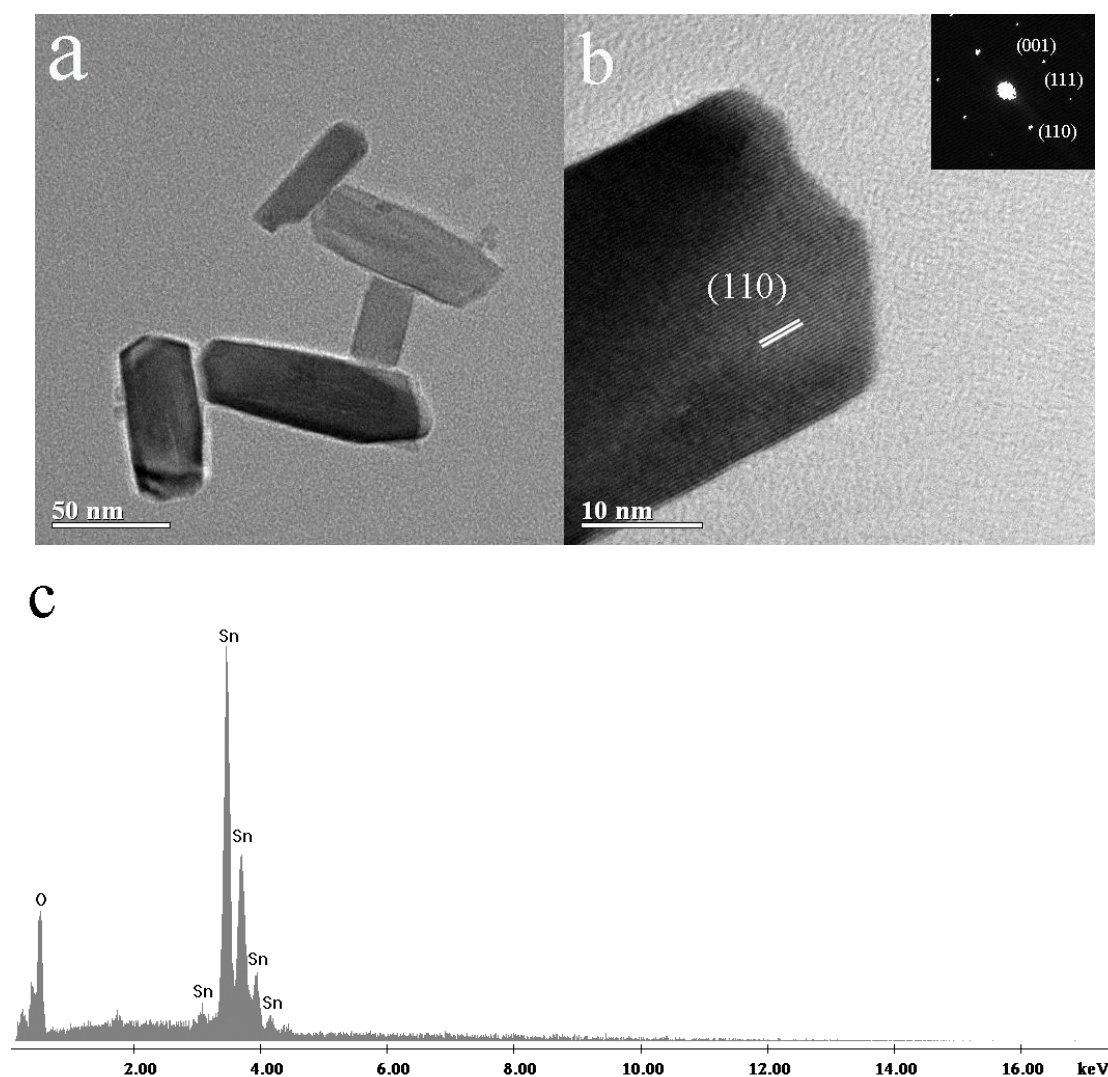

**Figure S1.** (a) TEM image of Zn<sub>2</sub>SnO<sub>4</sub> octahedrons after strong ultrasonic treatment. (b) HRTEM image of a single Zn<sub>2</sub>SnO<sub>4</sub> nanorod; the inset is corresponding SAED pattern recorded on the nanorod. (c) EDX spectrum of Zn<sub>2</sub>SnO<sub>4</sub> octahedrons.

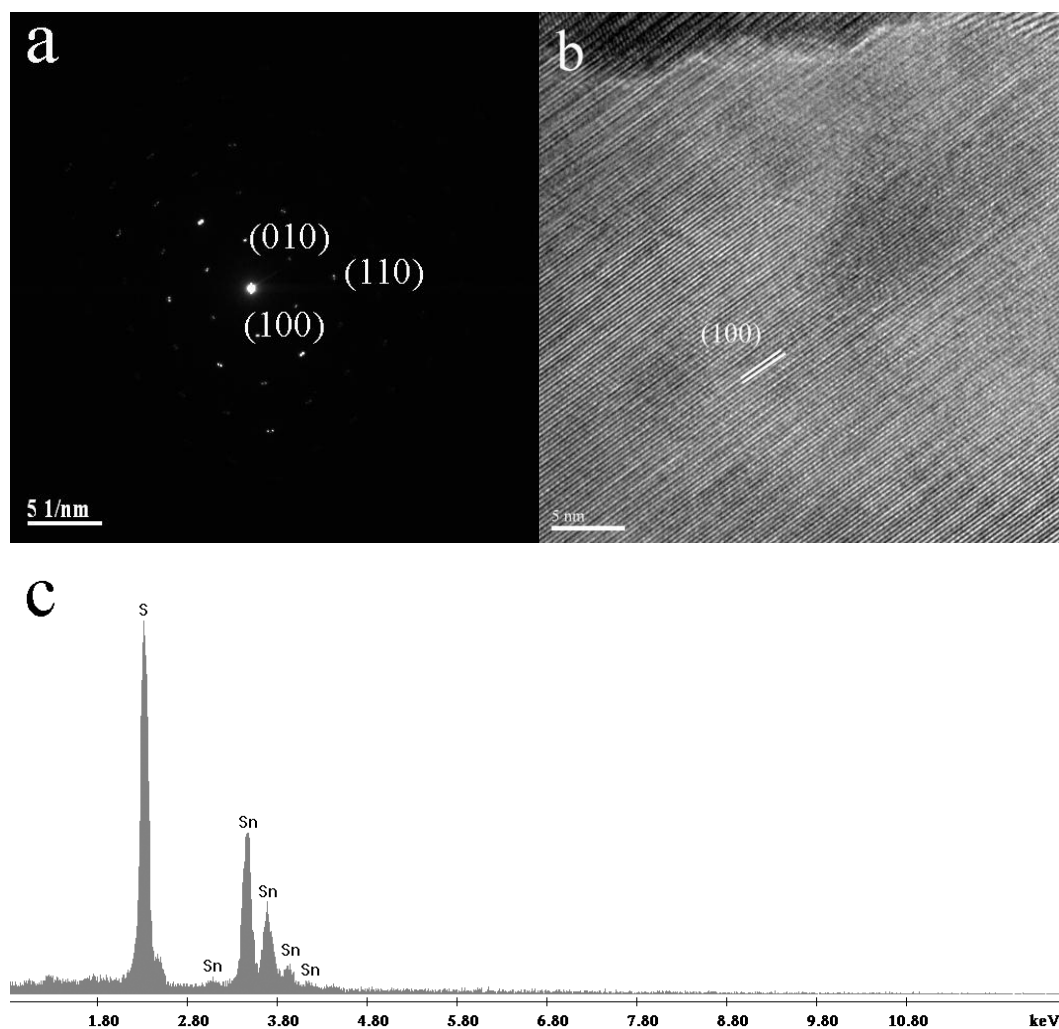

**Figure S2.** SAED pattern (a) and HRTEM image (b) recorded on an individual  $\text{SnS}_2$  nanosheet. (c) EDX spectrum of  $\text{SnS}_2$  octahedrons.

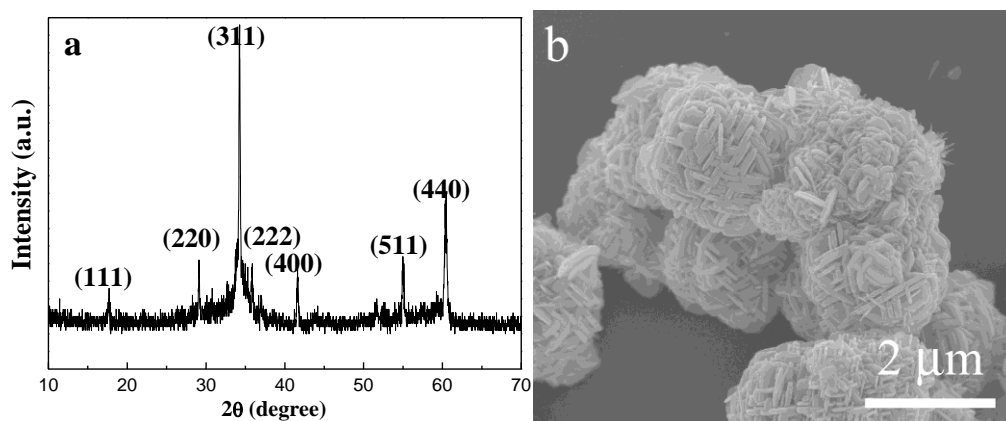

**Figure S3.** XRD pattern (a) and FE-SEM image (b) of the products synthesized through one-pot route, employing  $\text{Zn}(\text{CH}_3\text{COO})_2$ ,  $\text{Na}_2\text{SnO}_3$ ,  $\text{NaOH}$ , and  $\text{H}_4\text{EDTA}$  as reaction reagents.

The XRD pattern of the as-synthesized products can be indexed to pure cubic-phase  $\text{Zn}_2\text{SnO}_4$  (JCPDS no. 74-2184). FE-SEM image shows that the products consist of hierarchical reel of thread-like architectures assembled from nanoplates.

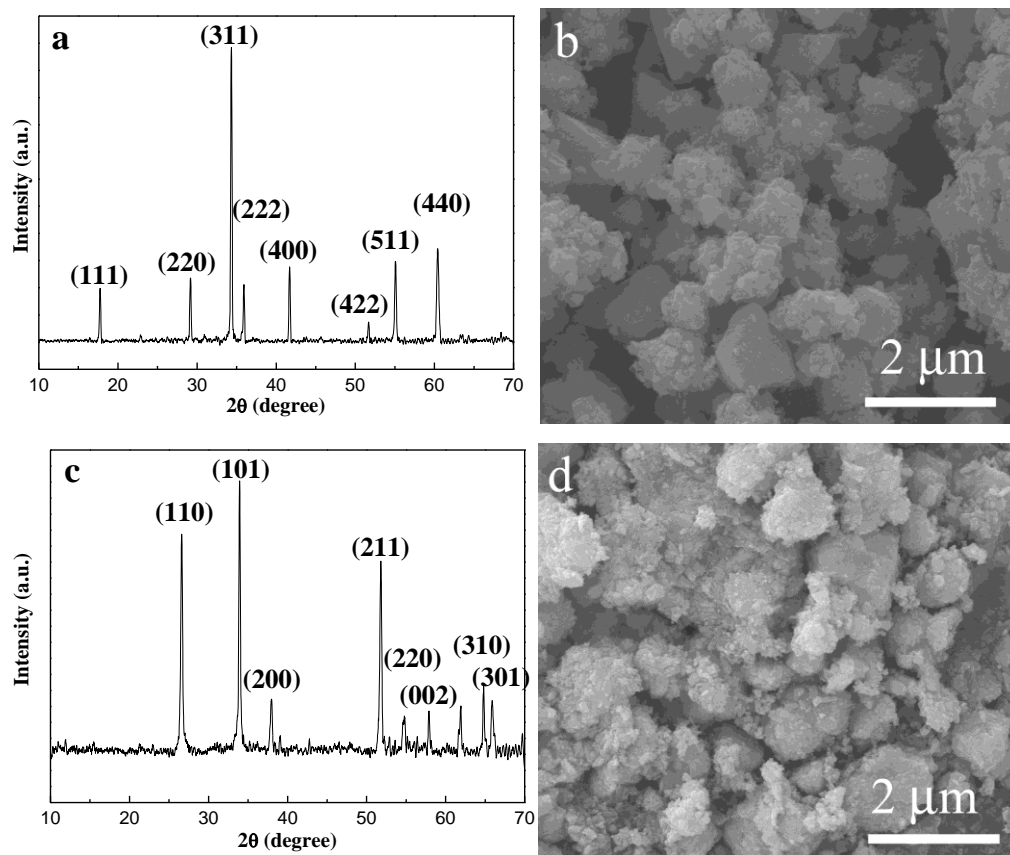

**Figure S4.** XRD pattern (a) and FE-SEM image (b) of the products synthesized at 180 °C for 12 h. XRD pattern (c) and (d) FE-SEM image of the products obtained through replacing  $\text{Zn}_2\text{SnO}_4$  octahedrons with irregular  $\text{Zn}_2\text{SnO}_4$  particles.

The XRD pattern of the as-synthesized products can be indexed to cubic-phase  $\text{Zn}_2\text{SnO}_4$  (JCPDS no. 74-2184). From EF-SEM image of the corresponding products, it can be seen that the products are irregular particles. The XRD pattern shown in Figure S4c can be indexed to tetragonal-phase  $\text{SnO}_2$  (JCPDS no. 88-0287). After the chemical conversion, irregular  $\text{Zn}_2\text{SnO}_4$  particles change to irregular  $\text{SnO}_2$  particles (Figure S4d).

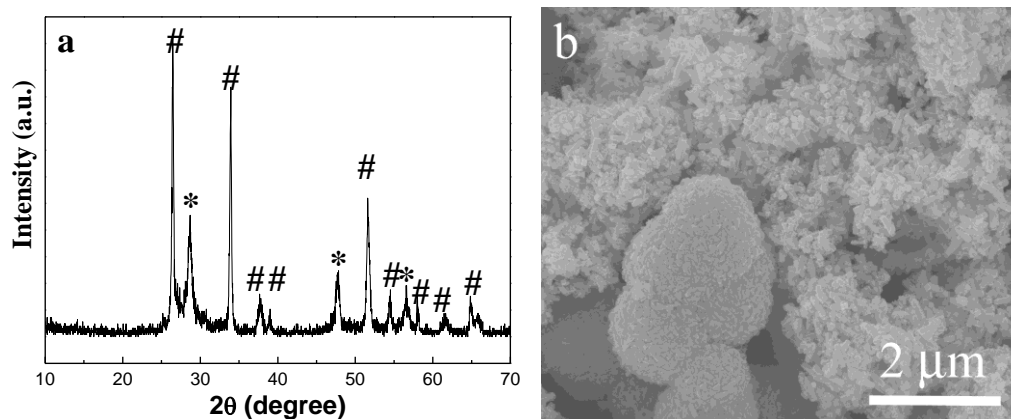

**Figure S5.** XRD pattern (a) and FE-SEM image (b) of the products synthesized through one-pot route, employing Zn(CH<sub>3</sub>COO)<sub>2</sub>, Na<sub>2</sub>SnO<sub>3</sub>, NaOH, H<sub>4</sub>EDTA, and thioacetamide as reaction reagents.

XRD pattern of the products can be indexed to tetragonal-phase SnO<sub>2</sub> (denoted as #, JCPDS no. 88-0287) and hexagonal-phase ZnS (denoted as \*, JCPDS no. 89-2739). FE-SEM image shows that the products consist of short nanorods and microspheres. No hierarchical SnS<sub>2</sub> octahedrons were obtained.

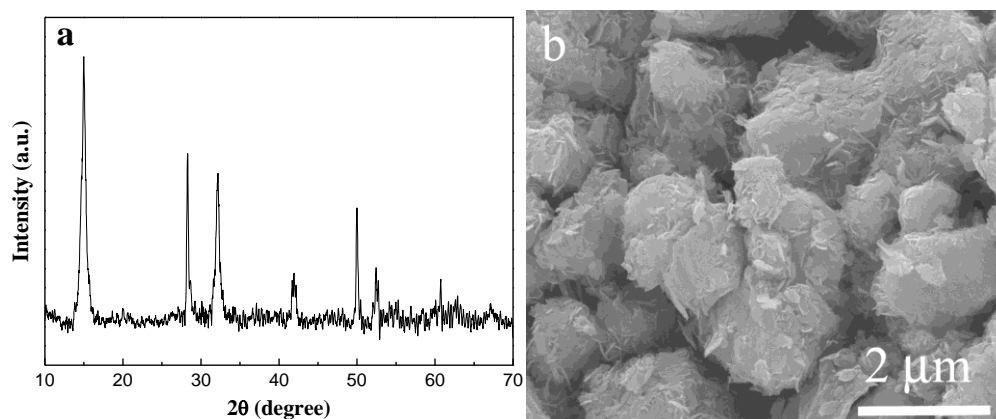

**Figure S6.** XRD pattern (a) and FE-SEM image (b) of the products synthesized at 200 °C for 8 h, using irregular Zn<sub>2</sub>SnO<sub>4</sub> particles, H<sub>4</sub>EDTA, and thioacetamide as reaction reagents.

XRD pattern of the resultant products can be indexed to pure hexagonal-phase SnS<sub>2</sub> (JCPDS no. 89-3198). FE-SEM image shows that the products consist of irregular hierarchical microspheres built by nanosheets.



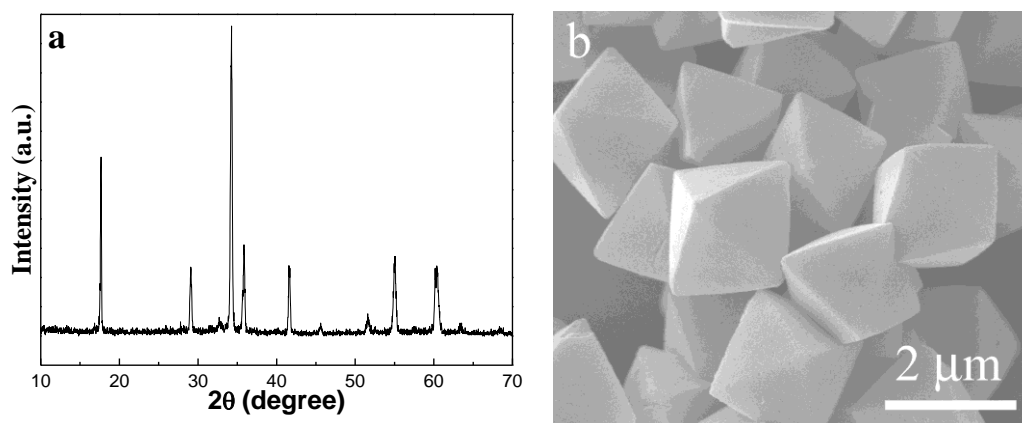

**Figure S7.** XRD pattern (a) and FE-SEM image (b) of  $\text{Zn}_2\text{SnO}_4$  octahedrons hydrothermally treated in the absence of  $\text{H}_4\text{EDTA}$ .

The XRD pattern of the resultant products can be indexed to cubic-phase  $\text{Zn}_2\text{SnO}_4$  (JCPDS no. 74-2184). From EF-SEM image of the corresponding products, it can be seen that the products consist of octahedral microcrystals.

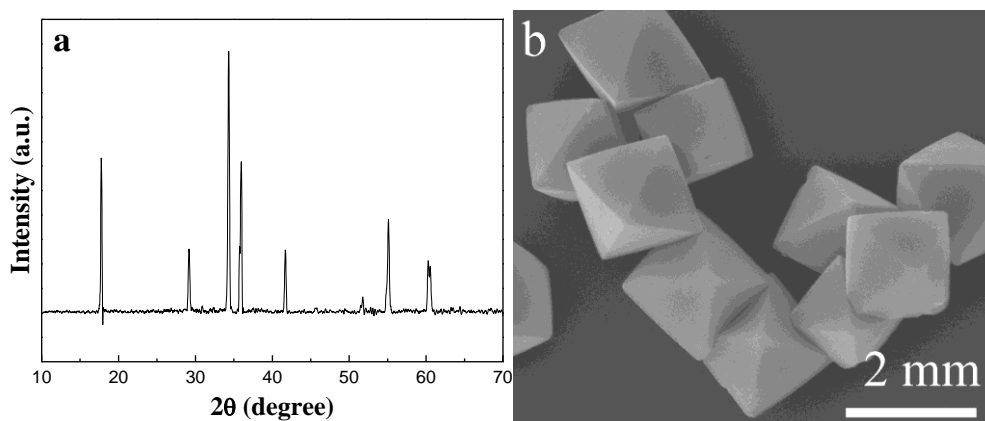

**Figure S8.** XRD pattern (a) and FE-SEM image (b) of  $\text{Zn}_2\text{SnO}_4$  octahedrons hydrothermally treated under acid condition ( $\text{pH}= 2.5$ ).

The XRD pattern of the resultant products can be indexed to pure cubic-phase  $\text{Zn}_2\text{SnO}_4$  (JCPDS no. 74-2184). From EF-SEM image of the corresponding products, it can be seen that the products still consist of octahedral microcrystals.

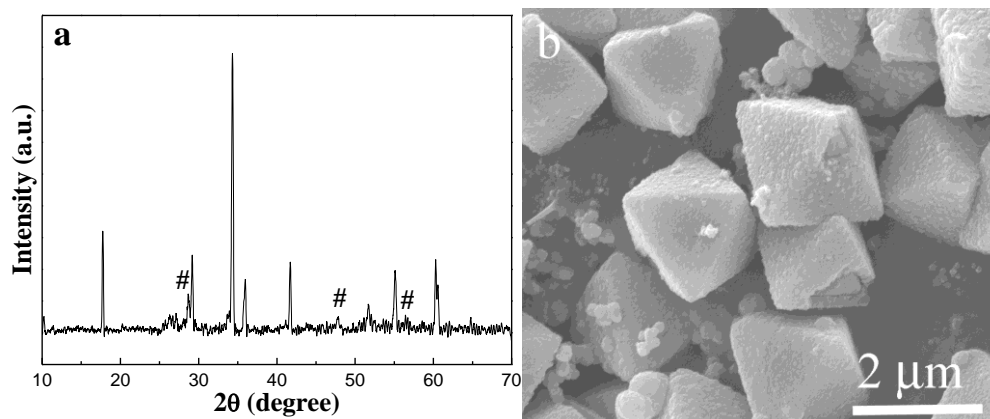

**Figure S9.** XRD pattern (a) and FE-SEM image (b) of the products synthesized with  $\text{Zn}_2\text{SnO}_4$  octahedrons and TTA.

The XRD pattern of the resultant products can be indexed to main cubic-phase  $\text{Zn}_2\text{SnO}_4$  (JCPDS no. 74-2184) and a small quantity of hexagonal-phase ZnS (denoted as #, JCPDS no. 89-2739). From EF-SEM image of the corresponding products, it can be seen that the products consist of octahedral microcrystals with core-shell structures.

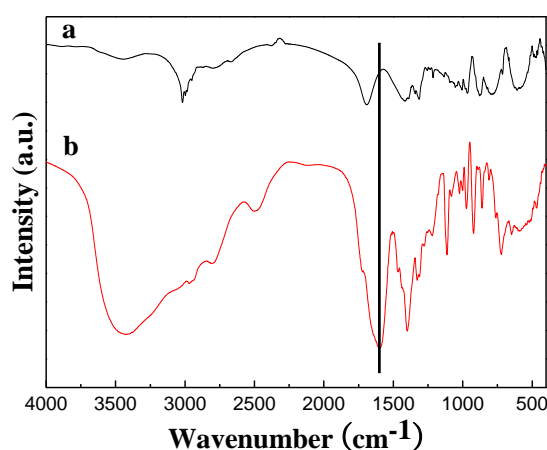

**Figure S10.** FT-IR spectra of (a) pure  $\text{H}_4\text{EDTA}$  and (b)  $\text{H}_4\text{EDTA}$  after hydrothermal reaction with  $\text{Zn}_2\text{SnO}_4$  octahedrons.

As shown in Figure S10a, the characteristic vibration peak of carboxyl in  $\text{H}_4\text{EDTA}$  is located at  $1691\text{ cm}^{-1}$ . After hydrothermal reaction with  $\text{Zn}_2\text{SnO}_4$  octahedrons, the characteristic vibration peak of carboxyl was red shifted to  $1610\text{ cm}^{-1}$  (Figure S10b).



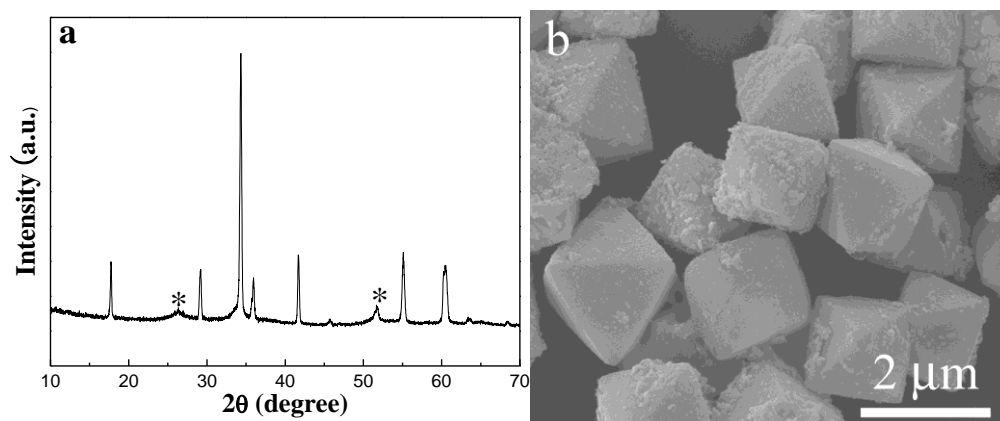

**Figure S11.** XRD pattern (a) and FE-SEM image (b) of  $\text{Zn}_2\text{SnO}_4$  octahedrons hydrothermally treated in the presence of tartaric acid.

The XRD pattern of the resultant products can be indexed to main cubic-phase  $\text{Zn}_2\text{SnO}_4$  (JCPDS no. 74-2184) and a small quantity of tetragonal-phase  $\text{SnO}_2$  (denoted as \*, JCPDS no. 88-0287). From EF-SEM image of the corresponding products, it can be seen that the products consist of octahedral microcrystals and a small quantity of nanoparticles.

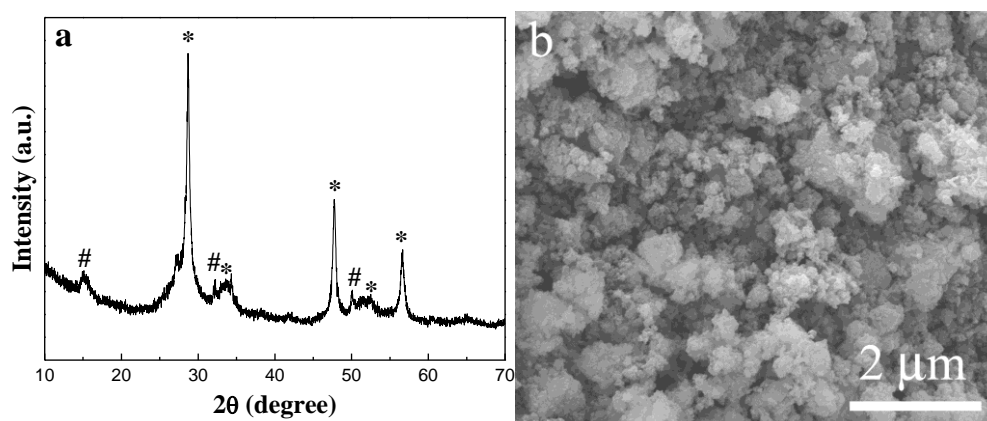

**Figure S12.** XRD pattern (a) and FE-SEM image (b) of the products synthesized with  $\text{Zn}_2\text{SnO}_4$  octahedrons, TTA, and tartaric acid.

The XRD pattern of the resultant products can be indexed to main hexagonal-phase  $\text{ZnS}$  (denoted as \*, JCPDS no. 89-2739) and a small quantity of hexagonal-phase  $\text{SnS}_2$  (denoted as #, JCPDS no. 89-3198). From EF-SEM image of the corresponding products, it can be seen that the products consist of irregular particles.

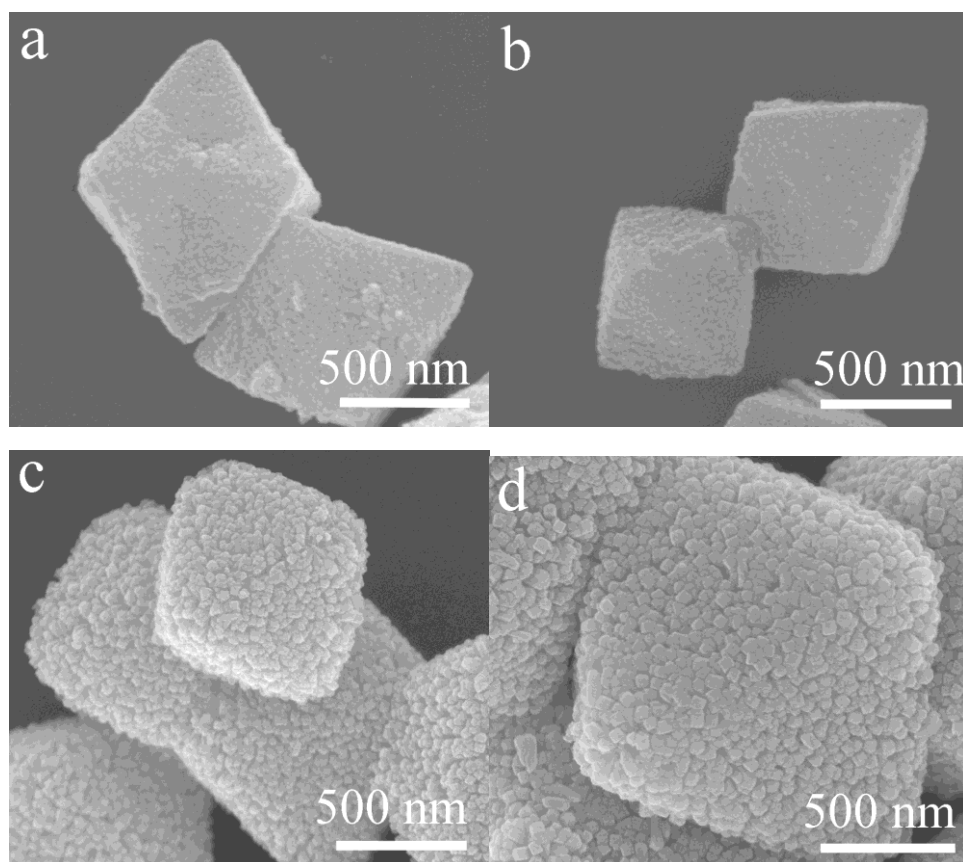

**Figure S13.** FE-SEM images of the intermediates at different reaction stages: (a) 0.5 h, (b) 1 h, (c) 4 h, and (d) 8 h.

As shown in Figure S13, the products still kept octahedral shape but with relatively rough surfaces after 0.5 h of hydrothermal reaction. Every octahedron consists of a lot of tiny nanoparticles. When reaction time was extended to 4 h, these nanoparticles obviously became bigger and were elongated at the same time. Up aging a longer period time up to 8 h, well-defined octahedrons assembled from nanorods were produced.

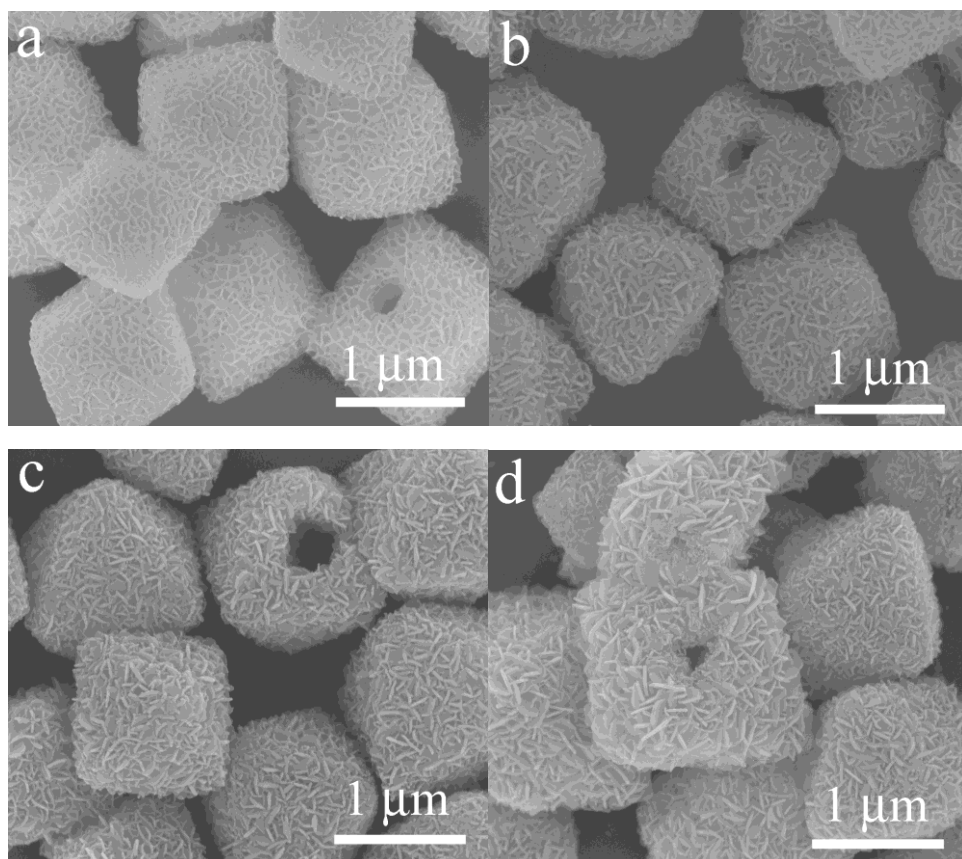

**Figure S14.** FE-SEM images of the intermediates at different reaction stages: (a) 0.5 h, (b) 1 h, (c) 2 h, and (d) 4 h.

As can be seen from Figure S14, the products have become hollow hierarchical octahedrons assembled from nanosheets after only 0.5 h of hydrothermal reaction. But, these nanosheets have not regular shapes at the moment. With increasing reaction time, these nanosheets would evolve into uniform ones with definite edges.

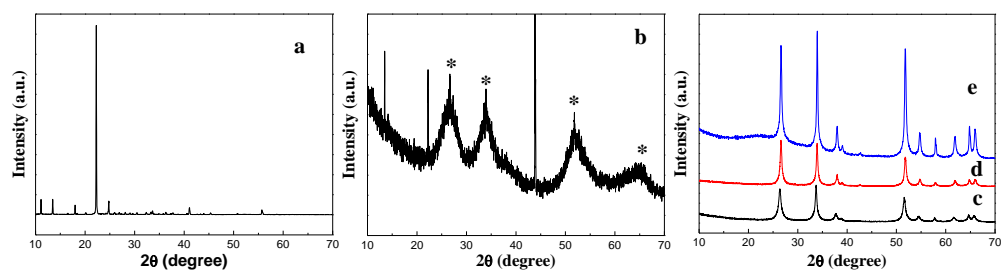

**Figure S15.** XRD patterns of the intermediates at different reaction stages: (a) 0.5 h, (b) 1 h, (c) 4 h, (d) 8 h, and (e) 12 h.

In Figure S15b, the diffraction peaks denoted as \* can be indexed to tetragonal-phase  $\text{SnO}_2$  (JCPDS no. 88-0287).

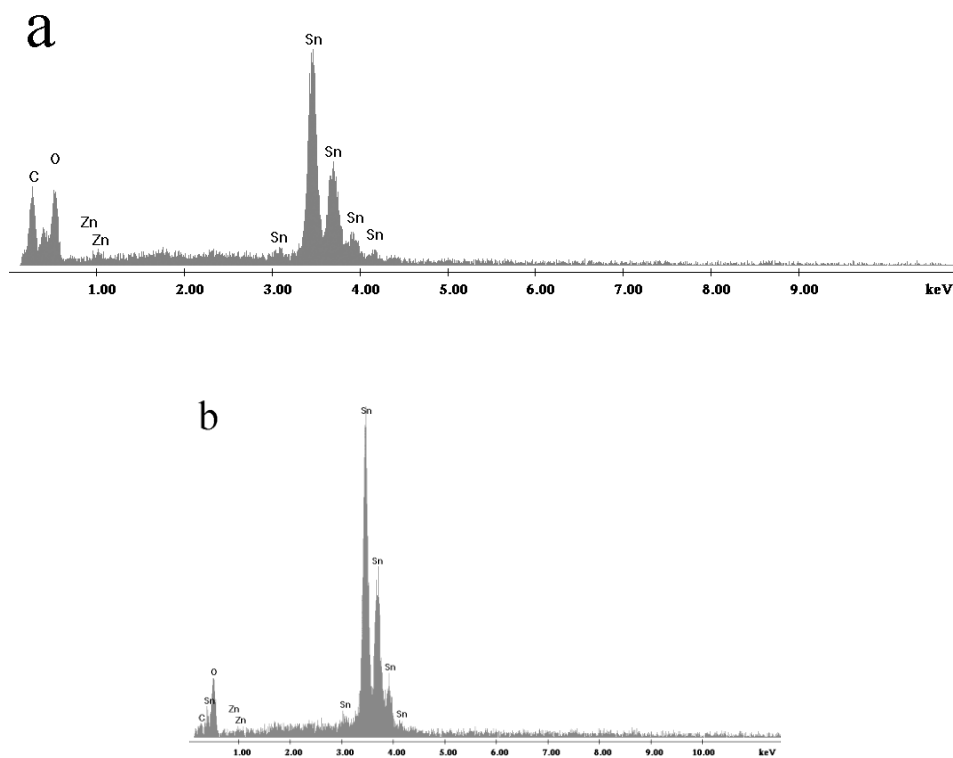

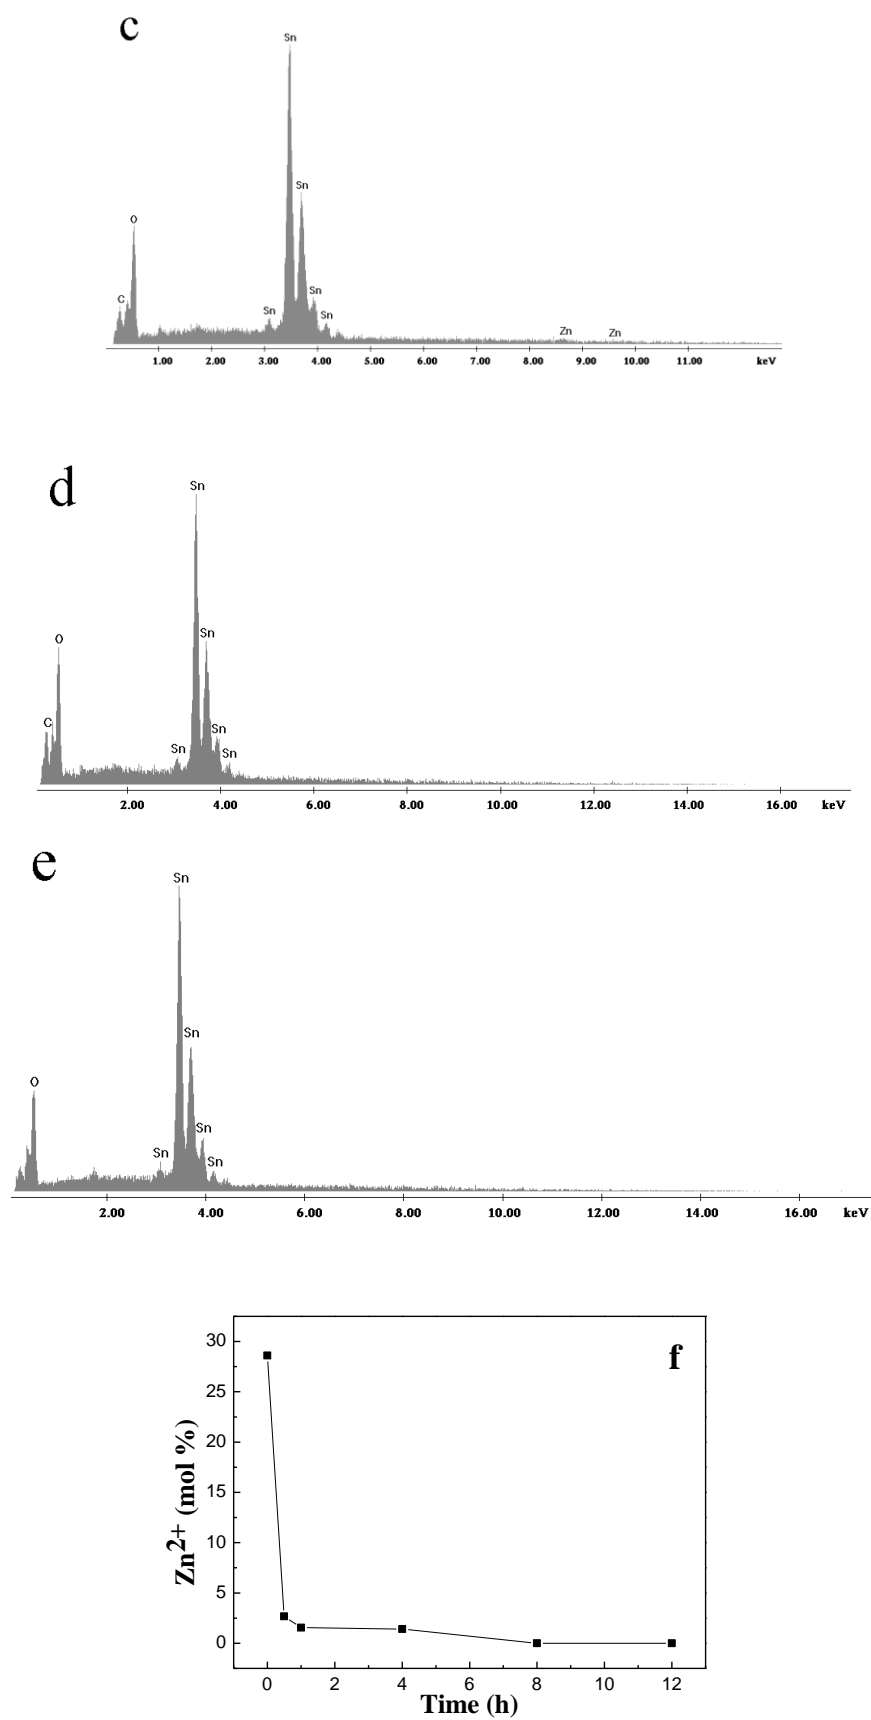

**Figure S16.** EDX spectra of the intermediates at different reaction stages: (a) 0.5 h, (b) 1 h, (c) 4 h, (d) 8 h, and (e) 12 h. Zn<sup>2+</sup> ions content changes of the intermediate solid products as a function of reaction time (f).

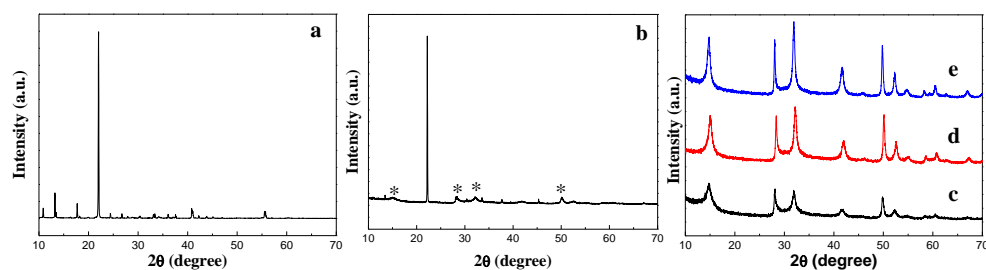

**Figure S17.** XRD patterns of the intermediates at different reaction stages: (a) 0.5 h, (b) 1 h, (c) 2 h, (d) 4 h, and (e) 8 h.

In Figure S17b, the diffraction peaks denoted as \* can be indexed to hexagonal-phase  $\text{SnS}_2$  (JCPDS no. 89-3198).

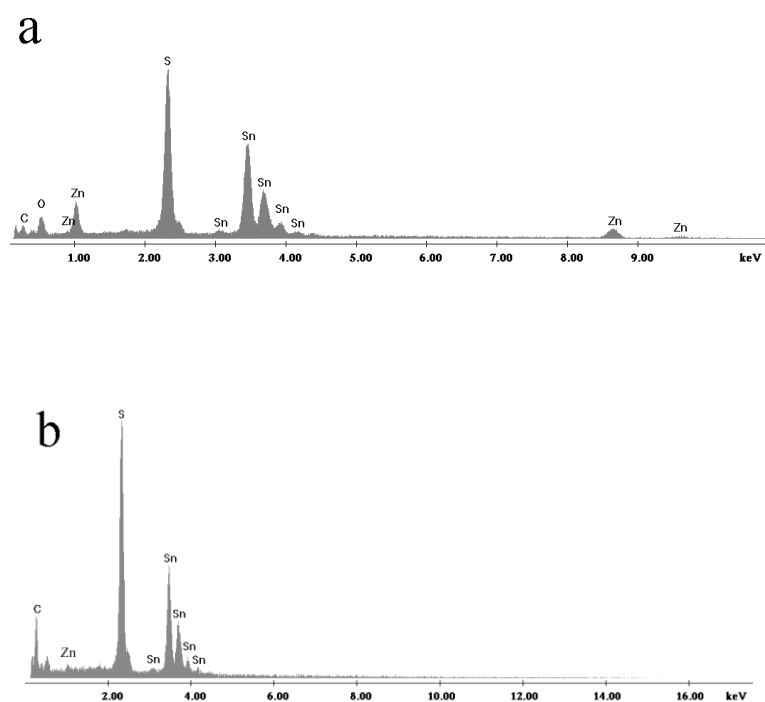



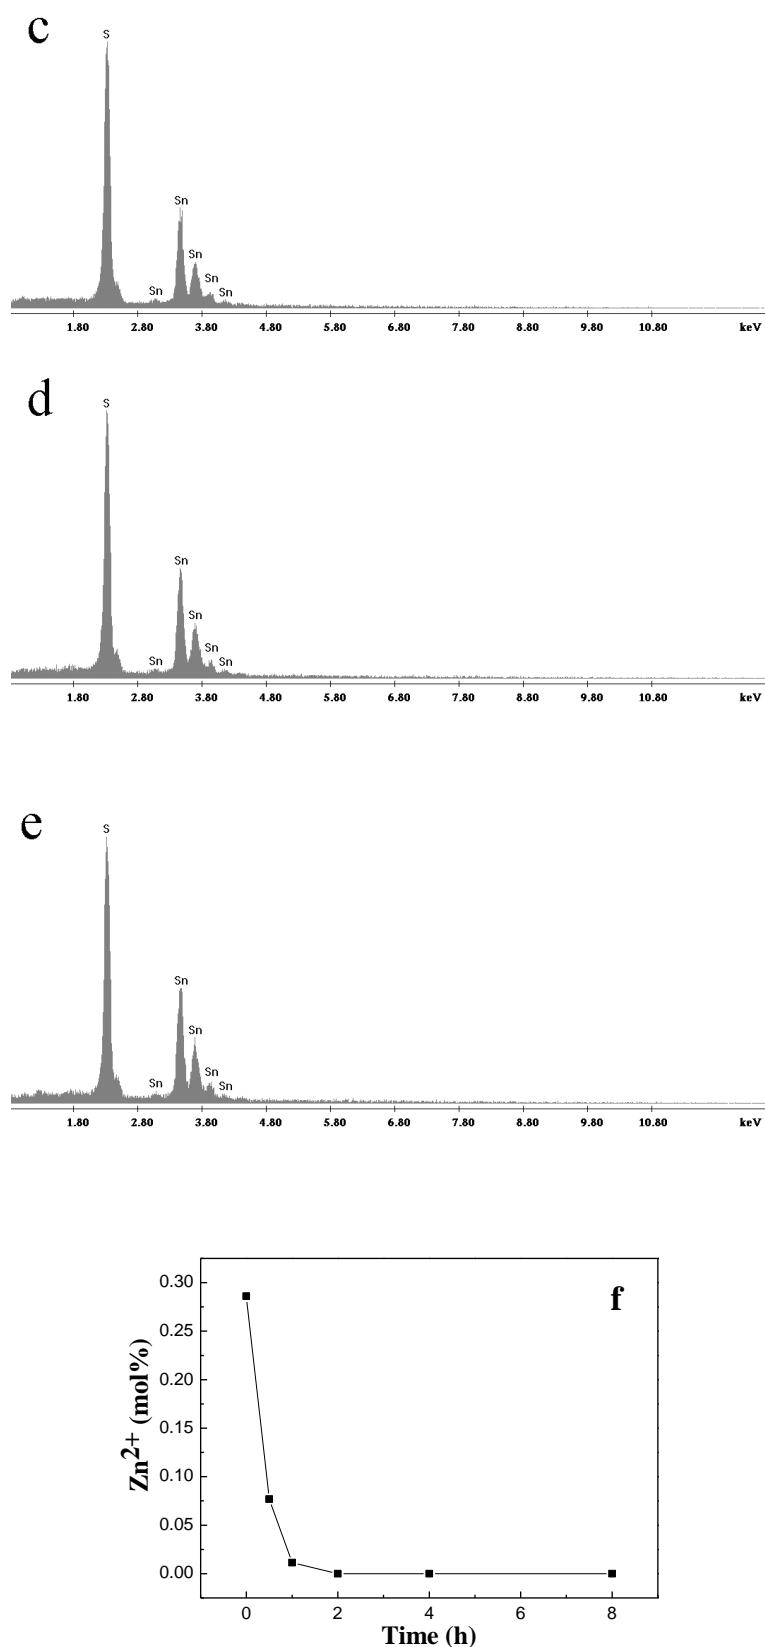

**Figure S18.** EDX spectra of the intermediates at different reaction stages: (a) 0.5 h, (b) 1 h, (c) 2 h, (d) 4 h, and (e) 8 h.  $\text{Zn}^{2+}$  ions content changes of the intermediate solid products as a function of reaction time (f).

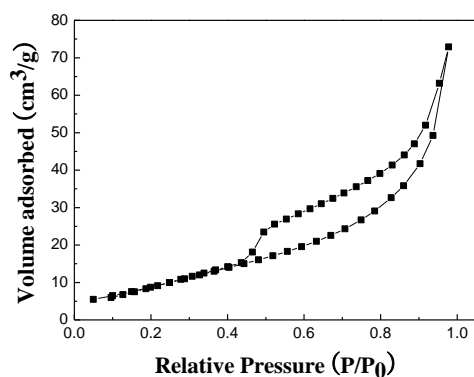

**Figure S19.** Nitrogen adsorption and desorption isotherms of hierarchical SnS<sub>2</sub> octahedrons (c).

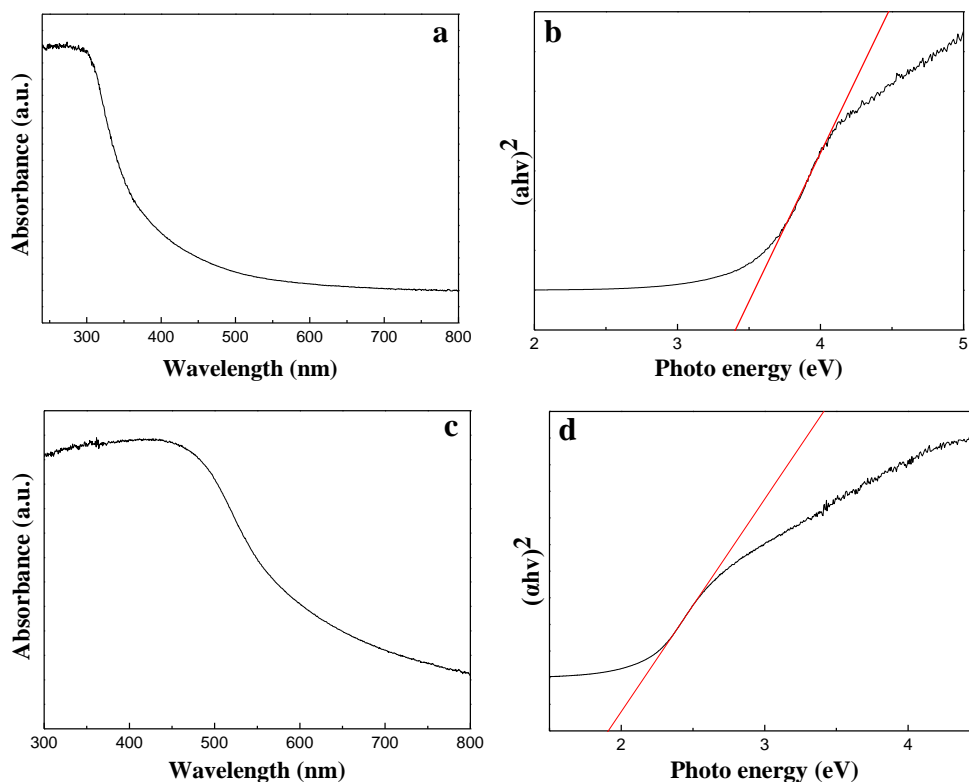

**Figure S20.** UV-visible DRS of (a) hierarchical SnO<sub>2</sub> octahedrons and (c) hierarchical SnS<sub>2</sub> octahedrons. Plots of  $(\alpha h\nu)^2$  versus the photon energy ( $h\nu$ ) of the-synthesized (b) hierarchical SnO<sub>2</sub> octahedrons and (d) hierarchical SnS<sub>2</sub> octahedrons.

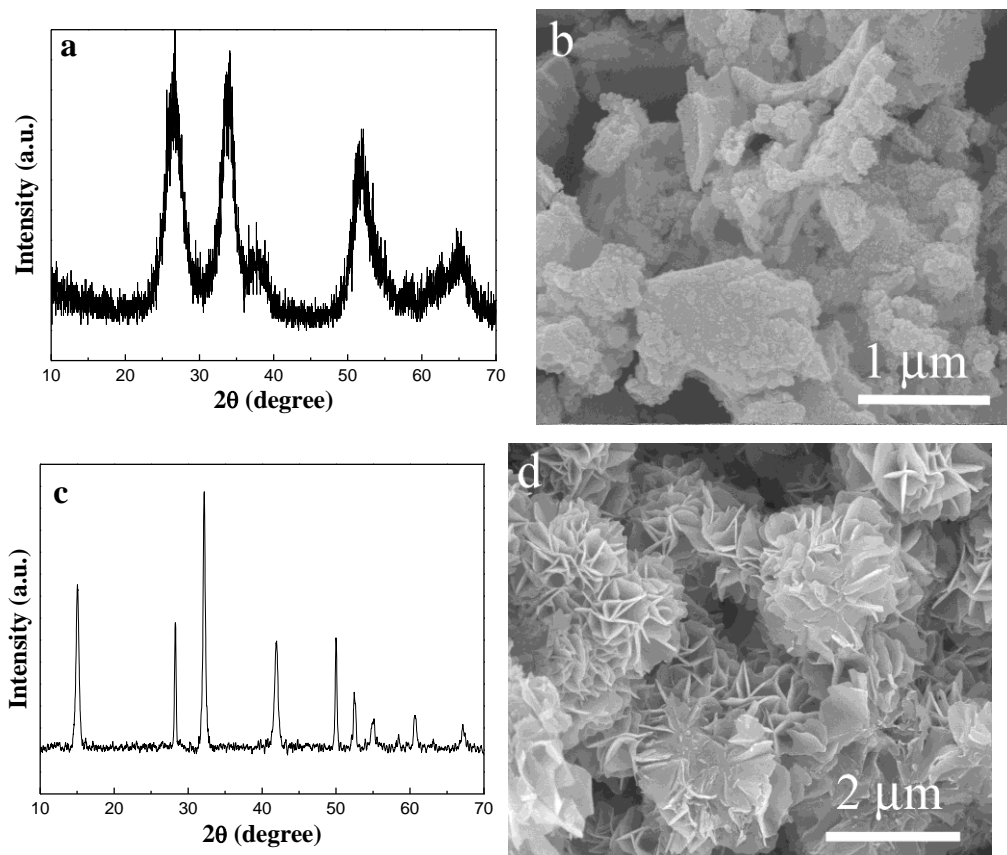

**Figure S21.** XRD pattern (a) and FE-SEM image (b) of SnO<sub>2</sub> synthesized by SSR method. XRD pattern (c) and FE-SEM image (d) of SnS<sub>2</sub> synthesized by SSR method.

The XRD pattern of the resultant products can be indexed to tetragonal-phase SnO<sub>2</sub> (Figure S21a, JCPDS no. 88-0287) and hexagonal-phase SnS<sub>2</sub> (Figure S21c, JCPDS no. 89-3198), respectively. From EF-SEM image of the corresponding products, it can be seen that SnO<sub>2</sub> products are conglomerations of tiny nanoparticles, which can be reflected by wide XRD diffraction peaks. SnS<sub>2</sub> shows hierarchical flower-like architectures assembled by nanosheets.

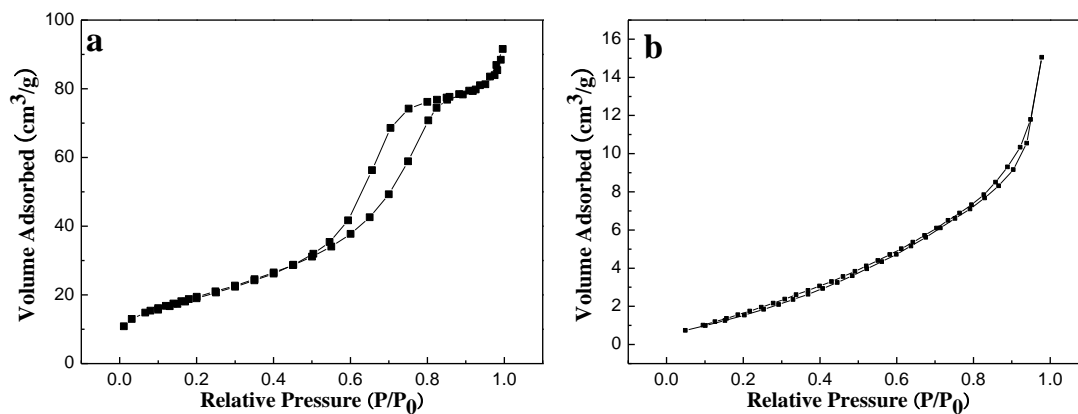

**Figure S22.** Nitrogen adsorption and desorption isotherms of (a) SnO<sub>2</sub> nanoparticles and (b) SnS<sub>2</sub> flowers obtained by SSR methods.

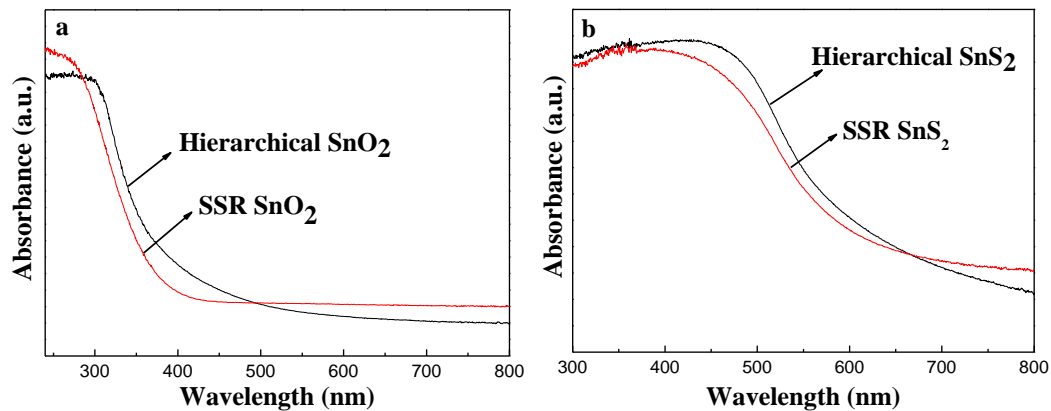

**Figure S23.** UV-visible absorption spectra of (a) hierarchical SnO<sub>2</sub> octahedrons and SnO<sub>2</sub> nanoparticles obtained through SSR method and (b) hierarchical SnS<sub>2</sub> octahedrons and SnS<sub>2</sub> flowers synthesized by SSR method.

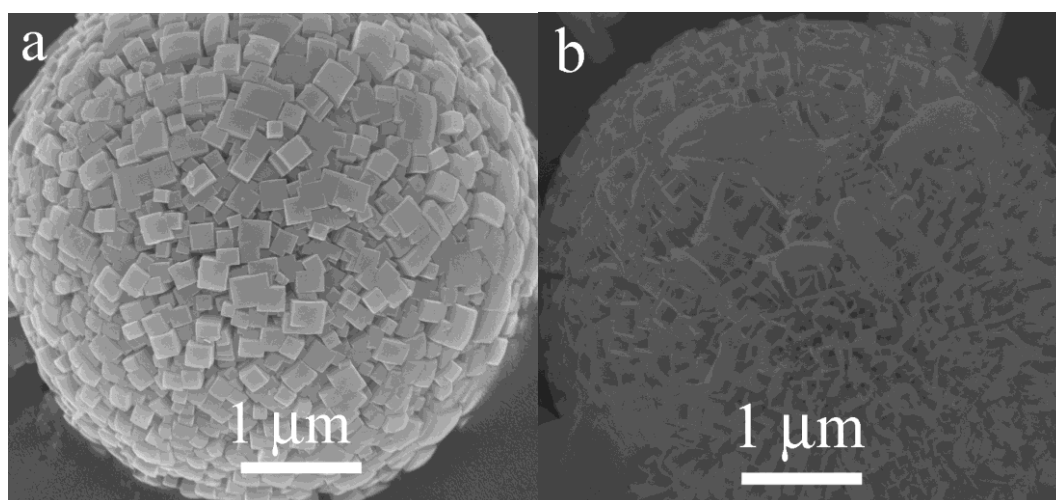

**Figure S24.** FE-SEM images of (a) the as-synthesized hierarchical  $\text{Bi}_2\text{CuO}_4$  microspheres assembled by nanorods and (b)  $\text{Bi}_2\text{O}_3$  nanotubes derived from selective extraction of  $\text{Cu}^{2+}$  ions in hierarchical  $\text{Bi}_2\text{CuO}_4$  microspheres through complexing agent.
